# Supplementary figures and images for: The association between polyunsaturated fatty acids and chronic obstructive pulmonary disease: a meta-analysis
Source: Royal Society of Chemistry journal article supplement (doi:10.1039/d3fo04675c), 2024-01-01

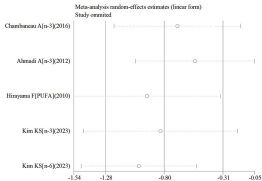

Supplement: d3fo04675c1.pdf [file d3fo04675c1.pdf]

Meta-analysis random-effects estimates (linear form)

Study omitted

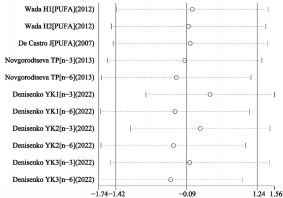

Supplement: d3fo04675c2.pdf [file d3fo04675c2.pdf]

Meta-analysis random-effects estimates (exponential form)

Study included

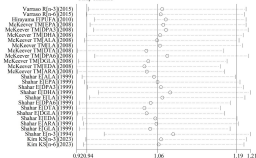

Supplement: d3fo04675c3.pdf [file d3fo04675c3.pdf]
